# Supplementary material for: Machine learning selected smoking-associated DNA methylation signatures that predict HIV prognosis and mortality
Source: PubMed Central journal article supplement (PMC6293604; doi:10.1186/s13148-018-0591-z), 2018-12-13

**A**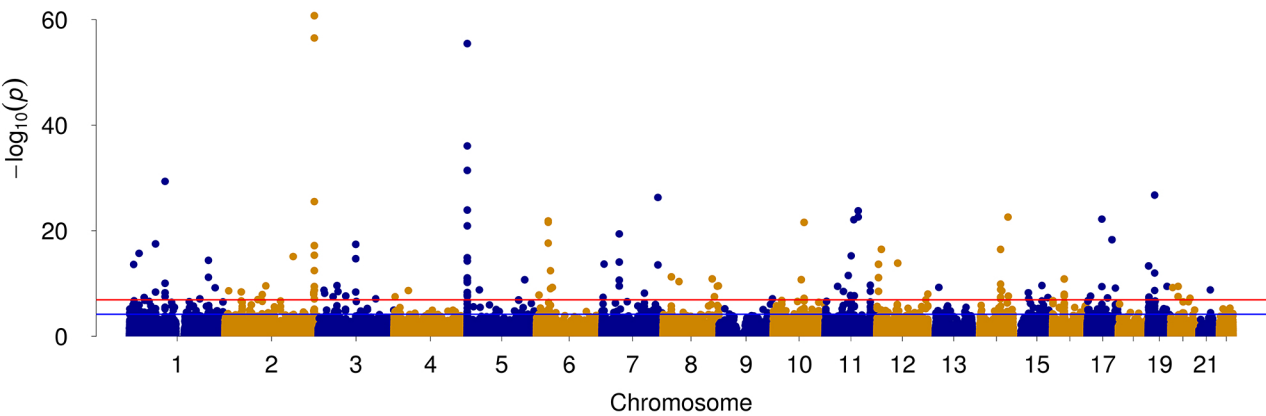**B**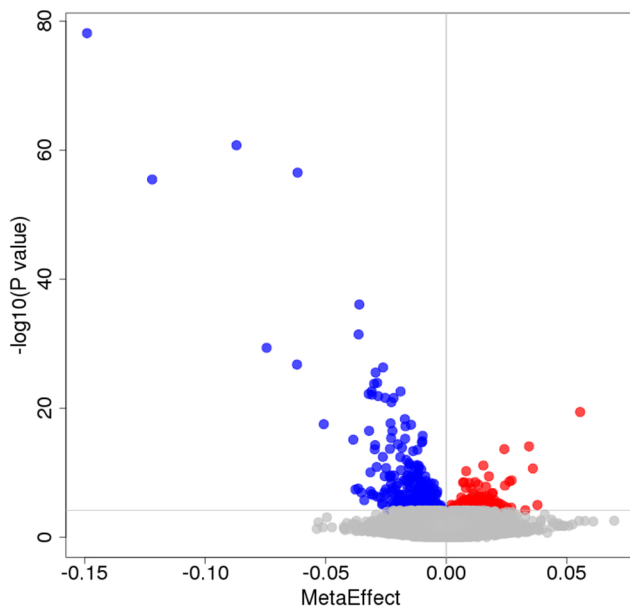

Supplement: 13148_2018_591_MOESM2_ESM.pdf [file 13148_2018_591_MOESM2_ESM.pdf]
